# Supplementary material
Source: PubMed Central journal article supplement (PMC5300021)

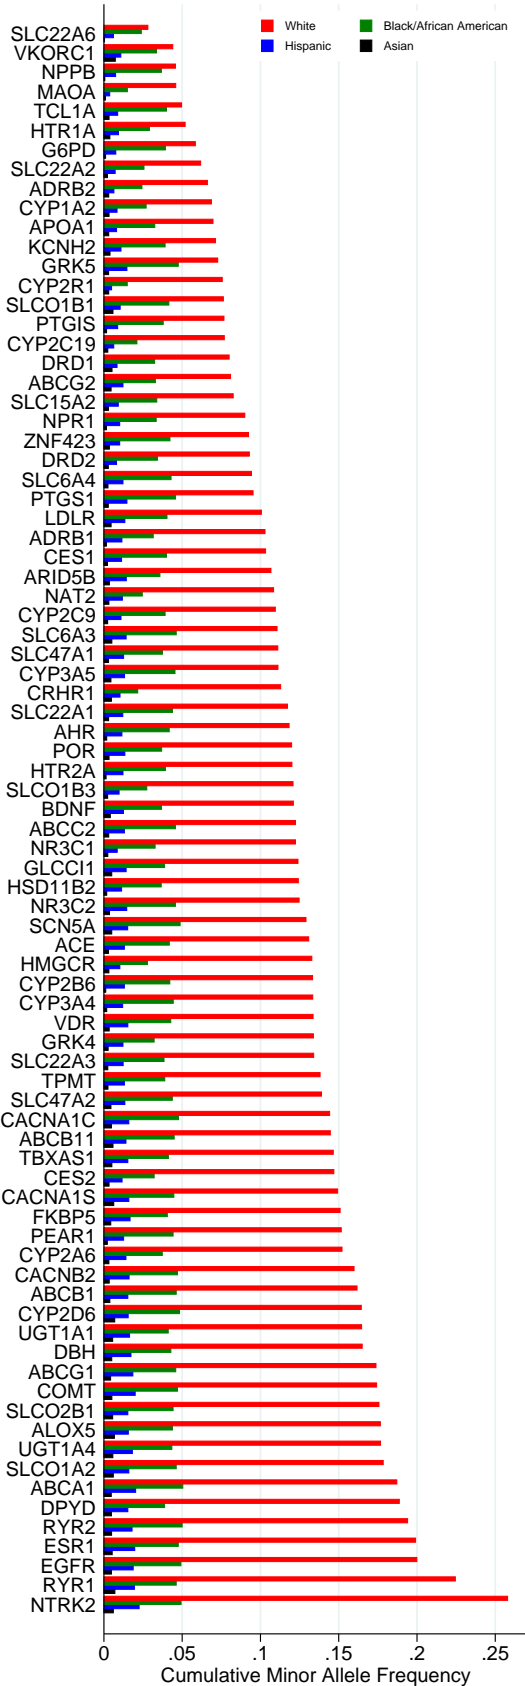

Supplement: CPT-100-160-s001.pdf [file CPT-100-160-s001.pdf]
